# Supplementary material
Source: PubMed Central journal article supplement (PMC4750686)
Supplement: AAC.01907-15_zac002164821so1.pdf [file AAC.01907-15_zac002164821so1.pdf]

**Supplementary Table 1.** Oligonucleotide primers, product size and annealing temperatures used for virulence gene detection.

| Gene          | Primer name     | Sequence (5'→3')                             | Accession number                 | Product Size (bp) | Annealing temperature (°C) | Reference  |
|---------------|-----------------|----------------------------------------------|----------------------------------|-------------------|----------------------------|------------|
| <i>se-int</i> | se-int-F        | 5' CTG TTT CGT ATG GCG ATC CT 3'             | ADX77197                         | 497               | 60                         | This study |
|               | se-int-R        | 5' AGG TTT GAT GGG GAA TGT GA 3'             |                                  |                   |                            |            |
| <i>sec</i>    | sec-F           | 5' CTC AAG AAC TAG ACA TAA AAG CTA GG<br>3'  | -                                | 271               | 55                         | 22         |
|               | sec-R           | 5' TCA AAA TCG GAT TAA CAT TAT CC 3'         |                                  |                   |                            |            |
| <i>seh</i>    | seh-F           | 5' CAA CTG CTG ATT TAG CTC AG 3'             | -                                | 360               | 45                         | 23         |
|               | seh-R           | 5' GTC GAA TGA GTA ATC TCT AGG 3'            |                                  |                   |                            |            |
| <i>ebpS</i>   | ebpS-F          | 5' TGA CGA GGA CGA GAC AAC TG 3'             | ADX76580                         | 592               | 60                         | This study |
|               | ebpS-R          | 5' TTT GTT CCC TTG AGG TTT GC 3'             |                                  |                   |                            |            |
| <i>spsD</i>   | spsD-F          | 5' ATG GCG CGA TGA AGA TCA CA 3'             | ADX76659                         | 667               | 60                         | This study |
|               | spsD-R          | 5' CAC CTT TTC ACC TGG GAG CA 3'             |                                  |                   |                            |            |
| <i>spsL</i>   | spsL-F          | 5' CTG TTG AAA GAA CCG CAC CG 3'             | ADX75396                         | 738               | 60                         | This study |
|               | spsL-R          | 5' TCA ACT CAC CGC TTC CAC TC 3'             |                                  |                   |                            |            |
| <i>spsO</i>   | spsO-F          | 5' AGT ATG CGG TGG GGC TAT TG 3'             | ADX77254                         | 873               | 60                         | This study |
|               | spsO-R          | 5' AGT GAG AAA GAA AGC GCC GA 3'             |                                  |                   |                            |            |
| <i>lukS</i>   | lukS<br>pseud F | 5' TGT AAG CAG CAG AAA ATG GGG 3'            | -                                | 503               | 57                         | 24         |
|               | lukS<br>pseud R | 5' GCCCGATAGGACTTCTTACAA 3'                  |                                  |                   |                            |            |
|               | lukF<br>pseud F | 5' CCTGTCTATGCCGCTAATCAA 3'                  |                                  |                   |                            |            |
| <i>lukF</i>   | lukF<br>pseud R | 5' AGGTCATGGAAGCTATCTCGA 3'                  | -                                | 572               | 57                         | 24         |
|               | bap-6m          | 5' CCC TAT ATC GAA GGT GTA GAA TTG<br>CAC 3' |                                  |                   |                            |            |
| <i>bap</i>    | bap-7c          | 5' GCT GTT GAA GTT AAT ACT GTA CCT GC<br>3'  | -                                | 971               | 58                         | 25         |
|               | <i>icaA</i>     | icaA-F                                       | 5' TTT CGG GGA CAA GCA TCC AA 3' | ADX75478          | 506                        | 60         |
| icaA-R        |                 | 5' TGA CAA CTC GGC AGA AAT GC 3'             |                                  |                   |                            |            |
| <i>icaB</i>   | icaB-F          | 5' GGT CCA TAA GCC TGA GCG TT 3'             | ADX75476                         | 417               | 60                         | This study |
|               | icaB-R          | 5' GAT GAC GGC GAT AAA ACC GC 3'             |                                  |                   |                            |            |
| <i>icaC</i>   | icaC-F          | 5' AGA CAG AGG CTT AGC AAC AAC A 3'          | ADX75475                         | 237               | 60                         | This study |

|              |                   |                                      |          |     |    |            |
|--------------|-------------------|--------------------------------------|----------|-----|----|------------|
|              | <i>icaC</i> -R    | 5' CAC ATG TAT GCT CGG CTG GA 3'     |          |     |    |            |
| <i>icaD</i>  | <i>icaD</i> -F    | 5' ACC ATC GTT AAT GCC TTC TTT CT 3' | ADX75477 | 174 | 60 | This study |
|              | <i>icaD</i> -R    | 5' CGT ATT AGC GCA CAT TCG GTG 3'    |          |     |    |            |
| <i>siet</i>  | <i>siet</i> 1 tox | 5' ATG GAA AAT TTA GCG GCA TCT GG 3' | -        | 359 | 56 | 26         |
|              | <i>siet</i> 2 tox | 5' CCA TTA CTT TTC GCT TGT TGT GC 3' |          |     |    |            |
| <i>speta</i> | <i>speta</i> -F   | 5' CAA AAA GCG CCT TTA GCA AC 3'     | -        | 438 | 60 | This study |
|              | <i>speta</i> -R   | 5' CAC TGG TGC AGT CAA TCC AG 3'     |          |     |    |            |
| <i>expA</i>  | <i>expA</i> -1    | 5' GTT TTA ATT GGT AAA AAT ACA 3'    | -        | 413 | 42 | 27         |
|              | <i>expA</i> -2    | 5' ATA CCT GAT CCT GAA TTA CC 3'     |          |     |    |            |
| <i>expB</i>  | <i>expB</i> -1    | 5' CGC CTG GCG TAT ATG CTA AAA C 3'  | AB569087 | 408 | 60 | This study |
|              | <i>expB</i> -2    | 5' CTG CCG CTT TGC CAT CTT TA 3'     |          |     |    |            |

**Supplementary Table 2.** Summary of total reads and total mapped reads using different reference genomes.

| Sequenced sample | Total reads (bp) | Total mapped reads with reference ED99 (bp) | Total mapped reads with reference HKU10-30 (bp) | Total mapped reads with reference E140 (bp) |
|------------------|------------------|---------------------------------------------|-------------------------------------------------|---------------------------------------------|
| MSSP             | 3.014.639        | 2.567.304                                   | 2.174.112                                       | 2.797.893                                   |
| MRSP             | 2.576.240        | 2.241.214                                   | 1.617.578                                       | 2.196.676                                   |
